# Supplementary material for: The SWI/SNF chromatin remodeling factor DPF3 regulates metastasis of ccRCC by modulating TGF-β signaling
Source: PubMed Central journal article supplement (PMC9363427; doi:10.1038/s41467-022-32472-0), 2022-08-09
Supplement: 41467_2022_32472_MOESM3_ESM.pdf [file 41467_2022_32472_MOESM3_ESM.pdf]

### **Description of Additional Supplementary Files**

File Name: Supplementary Data 1

Description: Differentially expressed genes after DPF3a overexpression in 786-O cells.

File Name: Supplementary Data 2

Description: Differentially expressed genes after SNIP1 knockdown in 786-O cells.

File Name: Supplementary Data 3

Description: Differentially spliced genes upon DPF3a overexpression and SNIP1 knockdown in 786-O cells.
